# Supplementary material
Source: Research Square preprint supplement (doi:10.21203/rs.3.rs-10265335/v1)
Supplement: Supplementary file 1 [file 6a6a79bdf14db986d85e6456.docx]

| **Table S1**  Comparison of characteristics between included and excluded participants | | | | | | | |
| --- | --- | --- | --- | --- | --- | --- | --- |
| Variable | Included  *n* = 979 | |  | Excluded  *n* = 230 | |  | *p*-value |
|  | Mean | SD |  | Mean | SD |  |
| Age (years) | 13.82 | 1.63 |  | 13.75 | 1.41 |  | 0.601 |
| BMI *z*-score (units) | 0.096 | 1.14 |  | 0.258 | 1.16 |  | 0.062 |
| Sex (*n*, % of girls) | 541 | 55.3 |  | 118 | 51.3 |  | 0.305 |
| There were 68 missing values for age and 7 for BMI *z*-score in the excluded sample.  *P-*value for independent-samples *t*-tests in continuous variables and for χ² for categorical variables. | | | | | | | |
