# Supplementary material
Source: Research Square preprint supplement (doi:10.21203/rs.3.rs-10265335/v1)
Supplement: Supplementary file 2 [file d5d6f680b20155cfd10aafba.docx]

| **Table 1**  Descriptive characteristics of the study sample (*n* = 979) | | |
| --- | --- | --- |
|  | Mean | SD |
| Age (years) | 13.8 | 1.6 |
| BMI *z*-score (units) | 0.10 | 1.14 |
| HRQoL (units) |  |  |
| Total score | 74.5 | 11.7 |
| Physical dimension score | 82.6 | 11.3 |
| Psychosocial dimension score | 70.1 | 13.7 |
| Wellbeing (units) | 58.0 | 19.3 |
| Movement behaviors |  |  |
| MVPA (min/day) | 46.1 | 24.3 |
| Screen time (min/day) | 261.8 | 156.7 |
| Sleep (min/day) | 485.9 | 46.5 |
| Maternal BMI (kg/m2) | 25.0 | 4.6 |
| Socioeconomic status (*n*, %) |  |  |
| Low | 258 | 26.4 |
| Medium | 604 | 61.7 |
| High | 117 | 12.0 |
| Season (*n*, %) |  |  |
| Winter | 140 | 14.3 |
| Spring | 566 | 57.8 |
| Summer | 37 | 3.8 |
| Autumn | 236 | 24.1 |
| Abbreviations: BMI = Body mass index, HRQoL = Health-related quality of life, M = Mean, SD = Standard deviation, MVPA = Moderate-to-vigorous physical activity | | |

| **Table 2** |  | | | | |  |  | | | | |  |  | | | | |  |  | | | | |
| --- | --- | --- | --- | --- | --- | --- | --- | --- | --- | --- | --- | --- | --- | --- | --- | --- | --- | --- | --- | --- | --- | --- | --- |
| The association between meeting the 24-hour movement guidelines and HRQoL and wellbeing | | | | | | | | | | | | | | | | | | | | | | | |
|  | **HRQoL**  **total score** | | | | |  | **HRQoL**  **physical dimension** | | | | |  | **HRQoL**  **psychosocial dimension** | | | | |  | **Wellbeing** | | | | |
|  | ***β*** | | **95% CI** |  | ***p*-value** |  | ***β*** | | **95% CI** |  | ***p*-value** |  | ***β*** | | **95% CI** |  | ***p*-value** |  | ***β*** | | **95% CI** |  | ***p*-value** |
| None |  |  | Ref. |  |  |  |  |  | Ref. |  |  |  |  |  | Ref. |  |  |  |  |  | Ref. |  |  |
| PA | 1.1 |  | –1.0, 3.2 |  | 0.283 |  | 1.9 |  | –0.5, 4.3 |  | 0.113 |  | 0.7 |  | –1.6, 3.0 |  | 0.543 |  | 2.0 |  | –1.3, 5.3 |  | 0.223 |
| ST | **4.3** |  | **1.5, 7.0** |  | **0.004** |  | **4.2** |  | **1.3, 7.1** |  | **0.007** |  | **4.3** |  | **1.2, 7.5** |  | **0.010** |  | **4.6** |  | **0.2, 9.1** |  | **0.040** |
| Sleep | 1.3 |  | –0.8,3.4 |  | 0.217 |  | 1.0 |  | –1.3, 3.2 |  | 0.386 |  | 1.5 |  | –0.9, 3.8 |  | 0.209 |  | 1.6 |  | –1.8, 5.1 |  | 0.337 |
| PA+ST | **6.1** |  | **0.7, 11.4** |  | **0.029** |  | **8.4** |  | **4.2, 12.6** |  | **0.001** |  | 4.8 |  | –1.4, 11.1 |  | 0.118 |  | **11.4** |  | **5.2, 17.7** |  | **0.002** |
| PA+sleep | **3.7** |  | **0.7, 6.8** |  | **0.021** |  | **4.2** |  | **0.8, 7.7** |  | **0.020** |  | **3.5** |  | **0.2, 6.8** |  | **0.039** |  | 6.1 |  | –0.5, 12.8 |  | 0.068 |
| ST+sleep | **5.2** |  | **2.1, 8.3** |  | **0.002** |  | **5.6** |  | **2.8, 8.5** |  | **0.001** |  | **5.0** |  | **1.3, 8.6** |  | **0.010** |  | 5.7 |  | –1.6, 12.9 |  | 0.116 |
| PA+ST+sleep | **13.2** |  | **8.0, 18.3** |  | **0.001** |  | **11.3** |  | **7.3, 15.3** |  | **0.001** |  | **14.1** |  | **7.0, 21.3** |  | **0.003** |  | **11.5** |  | **0.7, 22.3** |  | **0.040** |
| Abbreviations: *β* = Regression coefficient, CI = Confidence interval, HRQoL = Health-related quality of life, None = no adherence to any guidelines, PA = adherence to the physical activity guideline only, PA+sleep = adherence to the physical activity and sleep guidelines, PA+ST = adherence to the physical activity and screen time guidelines, PA+ST+sleep = adherence to all guidelines, Sleep = adherence to the sleep guideline only, ST = adherence to the screen time guideline only, ST+sleep = adherence to the screen time and sleep guidelines, Ref. = Reference group | | | | | | | | | | | | | | | | | | | | | | | |
